# Supplementary material for: Induced pluripotent stem cell line from an atopic dermatitis patient heterozygous for c.2282del4 mutation in filaggrin: KCLi001-A
Source: PubMed Central journal article supplement — Stem Cell Res. Author manuscript; Available in PMC 2020 Sep 24. (PMC7514110; doi:10.1016/j.scr.2018.07.014), 2018-07-25
Supplement: NIHMS998450-supplement-File_1.pdf [file NIHMS998450-supplement-File_1.pdf]

To: Dr Dusko Ilic  
ACU  
Guy's Hospital  
Great Maze Pond  
London  
SE1 9RT

**Genetics Centre**  
Guy's Hospital, 5th Floor Tower Wing  
Great Maze Pond, London SE1 9RT  
Tel: 020-7188-1709

---

## ARRAY CGH REPORT

## CELL LINE

Last Name : **OP107**  
First Names : **P14**

Specimen No: 17/34499  
PRU No: 444780:01  
Date Taken:  
Date Rec'd: 24/10/2017  
Hospital No:

---

## NO ABNORMALITY DETECTED

**arr(1-22,X)x2**

Array CGH analysis of DNA from this cell line has been carried out using oligonucleotide arrays with ~60,000 probes across the genome. Any imbalance >1Mb has been excluded; however, due to the poor quality of DNA extracted from this sample, smaller imbalances have not been excluded. Please send an alternative sample if further array CGH testing is required.

The results are consistent with a normal female chromosome complement.

Please see separate report for the results of the microsatellite analysis.

*Array CGH is a technique for detecting abnormalities of genomic copy number. It has a higher resolution than karyotype analysis, and will therefore detect regions of imbalance too small to be detected by analysis of G-banded chromosomes. It will not detect balanced chromosome rearrangements or ploidy abnormalities such as triploidy, and low level mosaicism may not be detected. Interpretation of array CGH findings is based on current knowledge; future advances may provide further insight.*

Array platform: Agilent design 085030. Median resolution: 120kb. Data analysis: Agilent GW. Positional information: GRCh37/hg19

---

Reported by: **MRC** 

Authorised by: 

Date reported: **16/01/2018**
