# Supplementary material for: Induced pluripotent stem cell line from an atopic dermatitis patient heterozygous for c.2282del4 mutation in filaggrin: KCLi001-A
Source: PubMed Central journal article supplement — Stem Cell Res. Author manuscript; Available in PMC 2020 Sep 24. (PMC7514110; doi:10.1016/j.scr.2018.07.014), 2018-07-25
Supplement: NIHMS998450-supplement-File_3.pdf [file NIHMS998450-supplement-File_3.pdf]

| REPLICATE 1 |          |          |       |
|-------------|----------|----------|-------|
| MARKERS     | NANOG    | TRA-1-60 | TOTAL |
| CELL COUNTS | 193      | 195      | 207   |
|             | 93.23671 | 94.2029  |       |

| REPLICATE 2 |          |          |       |
|-------------|----------|----------|-------|
| MARKERS     | NANOG    | TRA-1-60 | TOTAL |
| CELL COUNTS | 118      | 123      | 123   |
|             | 95.93496 | 100      |       |

| REPLICATE 3 |       |          |       |
|-------------|-------|----------|-------|
| MARKERS     | NANOG | TRA-1-60 | TOTAL |
| CELL COUNTS | 308   | 302      | 320   |
|             | 96.25 | 94.375   |       |

| NANOG STATISTICS |          |  | SEM      |
|------------------|----------|--|----------|
|                  | 93.23671 |  |          |
|                  | 95.93496 |  |          |
|                  | 96.25    |  |          |
| AVERAGE          | 95.14056 |  | 0.956256 |

| TRA-1-60 STATISTICS |          |  | SEM      |
|---------------------|----------|--|----------|
|                     | 94.2029  |  |          |
|                     | 100      |  |          |
|                     | 94.375   |  |          |
| AVERAGE             | 96.19263 |  | 1.904332 |

| REPLICATE 1 |          |          |       |
|-------------|----------|----------|-------|
| MARKERS     | OCT3/4   | TRA-1-81 | TOTAL |
| CELL COUNTS | 217      | 212      | 225   |
|             | 96.44444 | 94.22222 |       |

| REPLICATE 2 |          |          |       |
|-------------|----------|----------|-------|
| MARKERS     | OCT3/4   | TRA-1-81 | TOTAL |
| CELL COUNTS | 142      | 143      | 153   |
|             | 92.81046 | 93.46405 |       |

| REPLICATE 3 |          |          |       |
|-------------|----------|----------|-------|
| MARKERS     | OCT3/4   | TRA-1-81 | TOTAL |
| CELL COUNTS | 262      | 254      | 271   |
|             | 96.67897 | 93.72694 |       |

| OCT3/4 STATISTICS |          |  | SEM      |
|-------------------|----------|--|----------|
|                   | 96.44444 |  |          |
|                   | 92.81046 |  |          |
|                   | 96.67897 |  |          |
| AVERAGE           | 95.31129 |  | 1.252247 |

| TRA-1-81 STATISTICS |          |  | SEM      |
|---------------------|----------|--|----------|
|                     | 94.22222 |  |          |
|                     | 93.46405 |  |          |
|                     | 93.72694 |  |          |
| AVERAGE             | 93.8044  |  | 0.222266 |
